# Supplementary material for: Exploratory Analysis of Outpatient Visits for US Adults Diagnosed with Lupus Erythematosus: Findings from the National Ambulatory Medical Care Survey 2006–2016
Source: MDPI journal article supplement (doi:10.3390/healthcare10091664), 2022-08-31
Supplement: s1 [file s1]

**Table S1.** List of all diagnosis codes used for comorbidities classifications (ICD-9 and ICD-10 CM codes).

| Disease module                                                                                      | Disease codes (ICD-9) | Disease codes (ICD-10) |
|-----------------------------------------------------------------------------------------------------|-----------------------|------------------------|
| Infectious And Parasitic Diseases                                                                   | 001-139               | A00-B99                |
| Neoplasms                                                                                           | 140-239               | C00-D49                |
| Endocrine, Nutritional and Metabolic Diseases, And Immunity Disorders                               | 240-279               | E00-E89                |
| Diseases of the Blood and Blood-Forming Organs and Certain Disorders Involving the Immune Mechanism | 280-289               | D50-D89                |
| Mental, Behavioral and Neurodevelopmental Disorders                                                 | 290-319               | F01-F99                |
| Diseases of the Nervous System and Sense Organs                                                     | 320-389               | G00-H95                |
| Diseases Of the Circulatory System                                                                  | 390-459               | I00-I99                |
| Diseases Of the Respiratory System                                                                  | 460-519               | J00-J99                |
| Diseases Of the Digestive System                                                                    | 520-579               | K00-K95                |
| Diseases Of the Genitourinary System                                                                | 580-629               | N00-N99                |
| Complications Of Pregnancy, Childbirth, and the Puerperium                                          | 630-679               | O00-O9A                |
| Diseases of the Skin and Subcutaneous Tissue                                                        | 680-709               | L00-L99                |
| Diseases Of the Musculoskeletal System and Connective Tissue                                        | 710-739               | M00-M99                |
| Congenital Anomalies                                                                                | 740-759               | Q00-Q99                |
| Certain Conditions Originating in the Perinatal Period                                              | 760-779               | P00-P96                |
| Symptoms, Signs and Abnormal Clinical and Laboratory Findings, Not Elsewhere Classified             | 780-799               | R00-R99                |
| Injury, Poisoning and Certain Other Consequences of External Causes                                 | 800-999               | S00-T88                |
| Supplementary Classification of Factors Influencing Health Status and Contact with Health Services  | V01-V91               | Z00-Z99                |

Using ICD-9 and ICD-10 codes and grouped by Multi-level Clinical Classification Software (CCS) categories. Source: Healthcare Cost and Utilization Project (HCUP).

**Table S2.** Top 10 most frequently mentioned medications for visits of lupus patients over time.

| 2006–2010<br>(n = 10,378,266) |                         |                        |     | 2011–2016<br>(n = 16,804,929) |                        |     | P-value <sup>c</sup> |
|-------------------------------|-------------------------|------------------------|-----|-------------------------------|------------------------|-----|----------------------|
| Rank                          | Medication <sup>b</sup> | Frequency <sup>a</sup> |     | Medication <sup>b</sup>       | Frequency <sup>a</sup> |     |                      |
| 1                             | Prednisone              | 2,005,926              | 19% | Hydroxychloroquine            | 6,216,056              | 37% | <0.05*               |
| 2                             | Hydroxychloroquine      | 1,910,098              | 18% | Prednisone                    | 4,153,175              | 25% | <0.05*               |
| 3                             | Multivitamin            | 864,744                | 8%  | Multivitamin                  | 2,892,781              | 17% | 0.09                 |
| 4                             | Esomeprazole            | 692,747                | 7%  | Furosemide                    | 2,211,628              | 13% | 0.06                 |
| 5                             | Methotrexate            | 691,950                | 7%  | Folic Acid                    | 1,468,899              | 9%  | 0.22                 |
| 6                             | Levothyroxine           | 449,961                | 4%  | Levothyroxine                 | 1,359,390              | 8%  | 0.14                 |
| 7                             | Amlodipine              | 447,968                | 4%  | Aspirin                       | 1,275,100              | 8%  | 0.14                 |
| 8                             | Folic Acid              | 405,497                | 4%  | Methotrexate                  | 1,240,753              | 7%  | 0.13                 |
| 9                             | Alprazolam              | 365,153                | 4%  | Mycophenolate mofetil         | 1,085,546              | 6%  | <0.05*               |
| 10                            | Cyclosporine            | 347,251                | 4%  | Omeprazole                    | 979,839                | 6%  | 0.12                 |

<sup>a</sup>Denominator for proportions is total visits of lupus patients during that time period.

<sup>b</sup>Medications included generic and brand formulations.

<sup>c</sup>P-values obtained from Rao–Scott chi-square test of independence with second order adjustment; p-value compares 2006–2010 vs. 2011–2016

\*Significance <0.05.

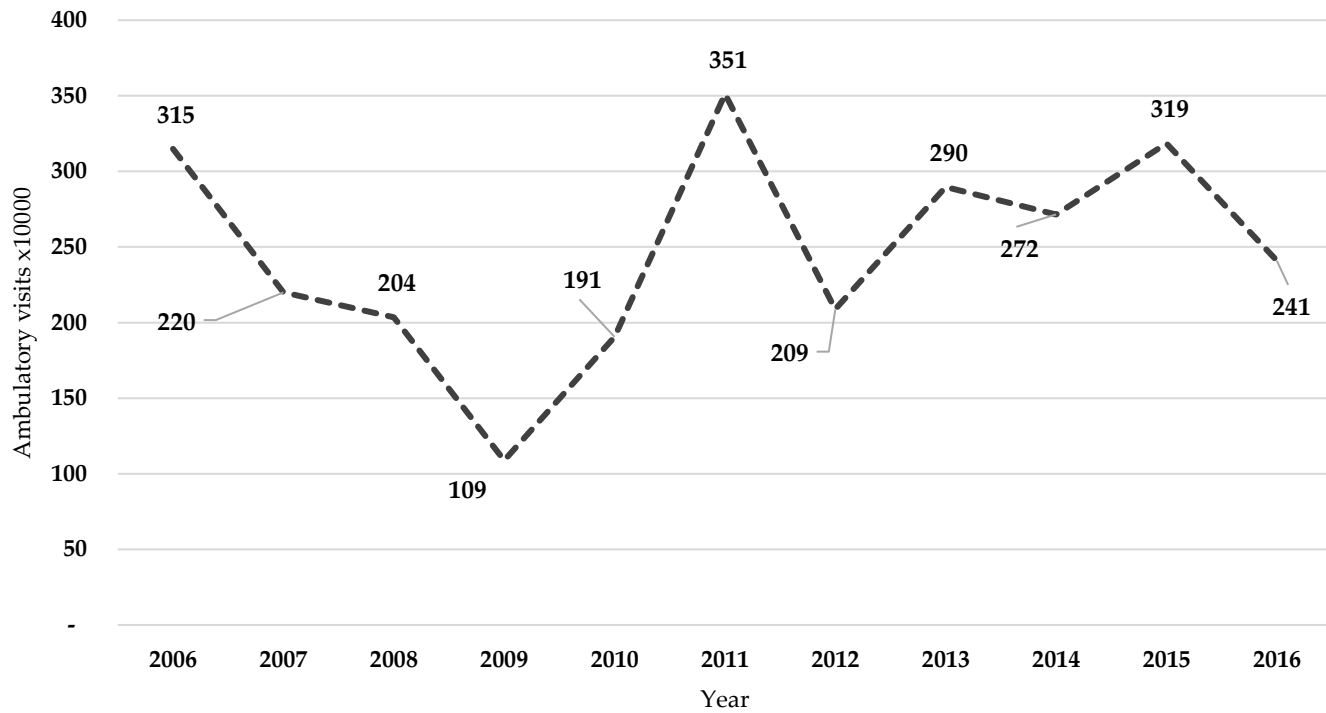

**Figure S1. National trends in ambulatory visits for lupus patients in the U.S. from 2006 to 2016.** Ambulatory visits are national weighted estimates produced using survey weights, where each patient encounter is assigned an inflation factor called patient visit weight used to predict the total number of physician office visits performed in the U.S.
